# Supplementary material
Source: MDPI journal article supplement (https://www.mdpi.com/2073-4395/12/12/3141)
Supplement: s1 [file s1]

**Table S1.** Minimum, mean and maximum number of *C. chalcites* alive larvae observed on banana bunches at 1 day prior to application and 1, 3 and 7 days post application of biorational products.

| Treatment       | Day -1 |       |     | Day 1 |       |     | Day 3 |      |     | Day 7 |      |     |
|-----------------|--------|-------|-----|-------|-------|-----|-------|------|-----|-------|------|-----|
|                 | Min    | Mean  | Max | Min   | Mean  | Max | Min   | Mean | Max | Min   | Mean | Max |
| Prevam®         | 17     | 26.75 | 35  | 4     | 8     | 13  | 1     | 1.5  | 2   | 0     | 0    | 0   |
| Cinamite®       | 23     | 25.75 | 28  | 8     | 9     | 11  | 4     | 7.75 | 10  | 3     | 4.25 | 7   |
| Intruder®       | 5      | 8     | 12  | 2     | 2.75  | 4   | 1     | 2    | 3   | 0     | 1.5  | 3   |
| Avenger®        | 14     | 17    | 22  | 6     | 10    | 15  | 4     | 7.75 | 10  | 3     | 6.5  | 10  |
| Indasol®        | 17     | 21.75 | 34  | 12    | 16.5  | 20  | 3     | 6.25 | 8   | 0     | 3.25 | 5   |
| Ripels®         | 18     | 25    | 32  | 12    | 16    | 21  | 10    | 13   | 16  | 4     | 6.75 | 11  |
| Bioknock®       | 13     | 15.5  | 19  | 6     | 9.5   | 13  | 4     | 5.75 | 6   | 4     | 4.75 | 6   |
| Garlitol Forte® | 12     | 17.5  | 23  | 7     | 10.75 | 15  | 4     | 5.75 | 8   | 0     | 2    | 4   |
| Control         | 12     | 22.5  | 32  | 10    | 19    | 27  | 9     | 16   | 23  | 7     | 14   | 20  |

a.

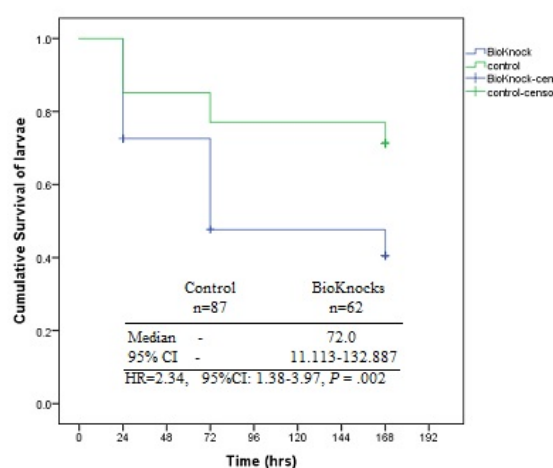

b.

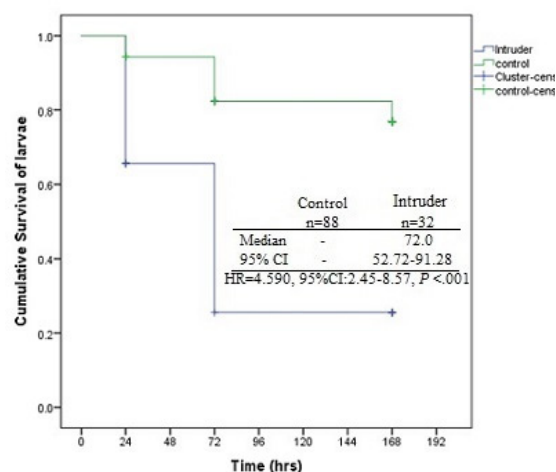

c.

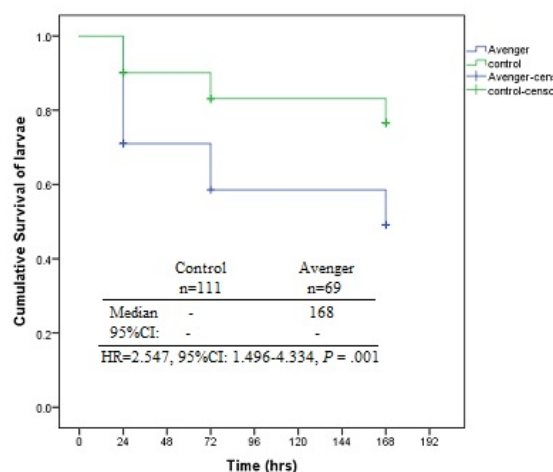

d.

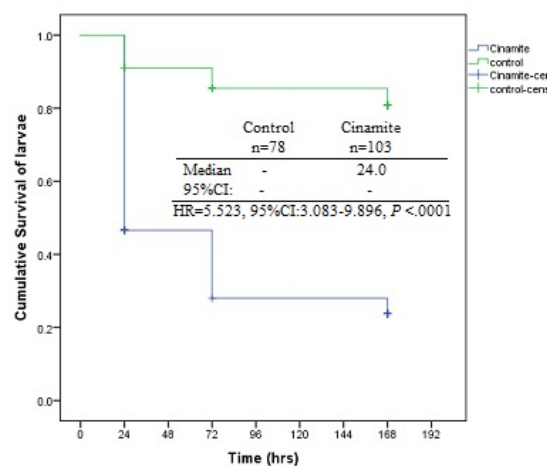

e.

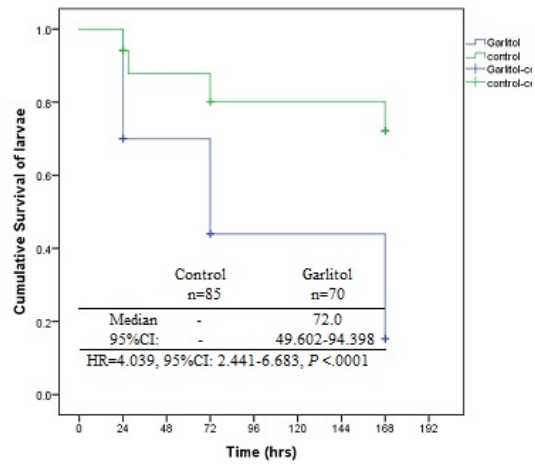

f.

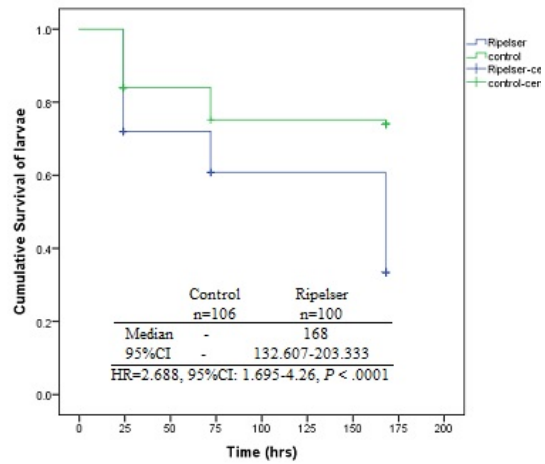

g.

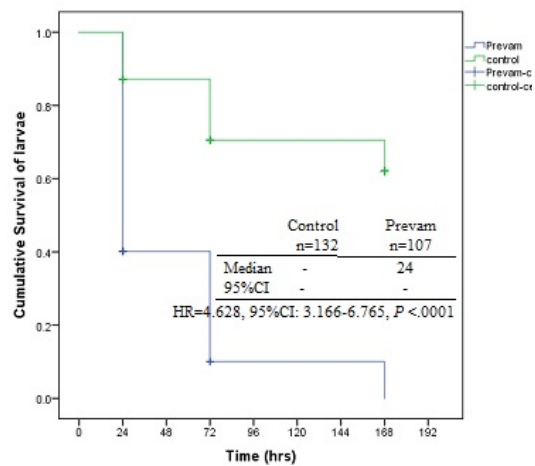

h.

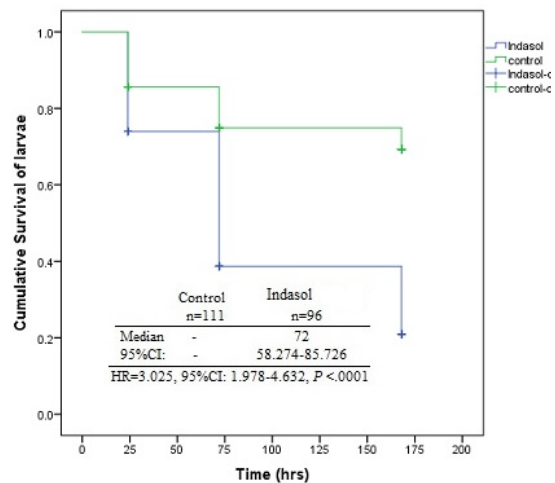

**Figure S1.** Survival analysis of *C. chalcites* larvae 1 day before, 1, 3, 7 days after the application of (a) Bioknock®, (b) Intruder®, (c) Avenger®, (d) Cinamite®, (e) Garlitrol Forte®, (f) Ripelser®, (g) Prevam® and (h) Indasol® (neem oil).
